# Supplementary material
Source: MDPI journal article supplement (https://www.mdpi.com/2073-4344/13/7/1028)
Supplement: s1 [file s1]

Supporting Information

# Synthesis of dual Z-scheme $\text{CuBi}_2\text{O}_4/\text{Bi}_2\text{Sn}_2\text{O}_7/\text{Sn}_3\text{O}_4$ photocatalysts with enhanced photocatalytic performance for the degradation of tetracycline under visible light irradiation

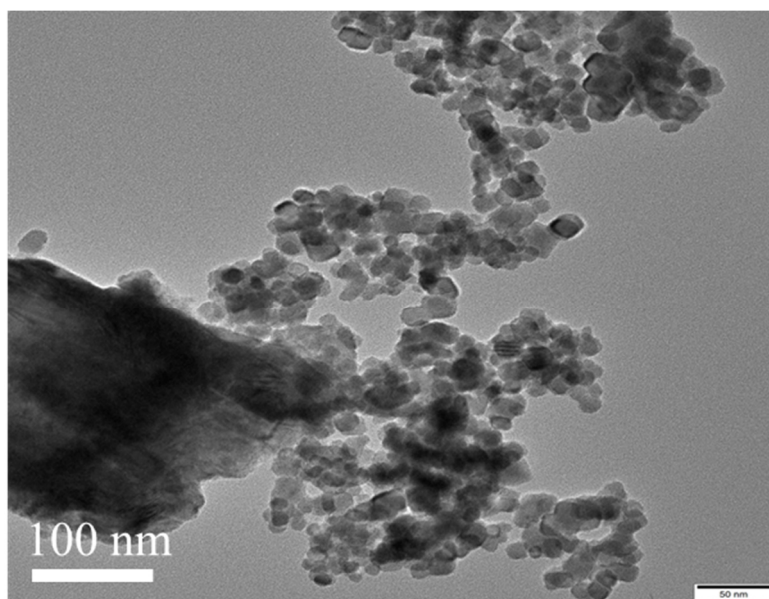

Figure S1. TEM image of CBS-2.

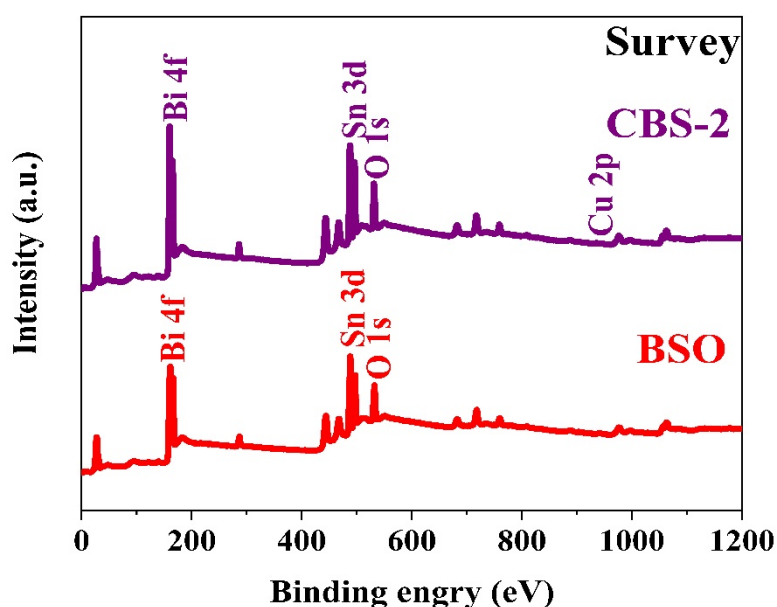

Figure S2. XPS survey spectra of BSO and CBS-2.
